# Supplementary material for: Whole Genome Sequencing identifies novel structural variant in a large Indian family affected with X - linked agammaglobulinemia
Source: bioRxiv or medRxiv preprint supplement (doi:10.1101/2020.10.05.20200949), 2021-04-14
Supplement: Supplementary file [file media-4.pdf]

| <b>Data</b>                                                                         | <b>P1</b>        | <b>P2</b>        | <b>P4</b>        | <b>P5</b>        |
|-------------------------------------------------------------------------------------|------------------|------------------|------------------|------------------|
| <b>Total number of reads (x2)</b>                                                   | 39111154         | 41867264         | 37556352         | 41367110         |
| <b>Trimmed reads (x2)</b>                                                           | 22325405         | 31637375         | 18905832         | 36276744         |
| <b>Reads mapped (x2)</b>                                                            | 22320244         | 31616422         | 18851742         | 36276174         |
| <b>Percentage mapped</b>                                                            | 99.08%           | 99.30%           | 99.71%           | 100%             |
| <b>Coverage</b>                                                                     | 74.4             | 105.4            | 62.8             | 120.9            |
| <b>Total variants</b>                                                               | 359,707          | 647,936          | 328,688          | 534,222          |
| <b>Protein altering variants</b>                                                    | 12,219           | 15,304           | 11,809           | 12,966           |
| <b>Rare variants (MAF &lt; 5%)</b>                                                  | 1,552            | 4,185            | 2,193            | 1,602            |
| <b>PID genetic variants (454 gene)</b>                                              | 9                | 9                | 17               | 16               |
| <b>Phenotype associated variant</b>                                                 | 0                | 0                | 0                | 0                |
| <b>Machine Used</b>                                                                 | HiSeq2500        | HiSeq2500        | HiSeq2500        | NovaSeq6000      |
| <b>Library Used</b>                                                                 | TruSeq DNA Exome | TruSeq DNA Exome | TruSeq DNA Exome | TruSeq DNA Exome |
| <b>Supplementary Table 1:</b> Whole exome sequencing data summary for each patient. |                  |                  |                  |                  |
