# Supplementary material for: Whole Genome Sequencing identifies novel structural variant in a large Indian family affected with X - linked agammaglobulinemia
Source: bioRxiv or medRxiv preprint supplement (doi:10.1101/2020.10.05.20200949), 2021-04-14
Supplement: Supplementary file [file media-5.pdf]

| <b>Data</b>                                                                       | <b>P1</b>       | <b>P4</b>       |
|-----------------------------------------------------------------------------------|-----------------|-----------------|
| <b>Total number of reads</b>                                                      | 506,703,008     | 2,101,160,202   |
| <b>Trimmed reads</b>                                                              | 420,926,397     | 1,718,944,763   |
| <b>Reads mapped</b>                                                               | 419,160,298     | 1,710,162,053   |
| <b>Percentage mapped</b>                                                          | 99.58%          | 99.49%          |
| <b>Coverage</b>                                                                   | 21 X            | 86 X            |
| <b>Total variants</b>                                                             | 4,905,687       | 4,904,615       |
| <b>Merged variants</b>                                                            | 6,517,075       |                 |
| <b>Rare variants (MAF &lt; 5%)</b>                                                | 890,387         |                 |
| <b>Common homozygous Variants</b>                                                 | 27,236          |                 |
| <b>In-silico prediction (CADD &gt;15)</b>                                         | 4               |                 |
| <b>Phenotype associated variant</b>                                               | 0               |                 |
| <b>Machine Used</b>                                                               | NovaSeq6000     | NovaSeq6000     |
| <b>Library Used</b>                                                               | TruSeq PCR free | TruSeq PCR free |
| <b>Supplementary Table 2:</b> Whole genome sequencing data summary for P1 and P4. |                 |                 |
