# Supplementary material for: Whole Genome Sequencing identifies novel structural variant in a large Indian family affected with X - linked agammaglobulinemia
Source: bioRxiv or medRxiv preprint supplement (doi:10.1101/2020.10.05.20200949), 2021-04-14
Supplement: Supplementary file [file media-6.pdf]

|                         |                   | Reference sample 1 | Reference sample 2 | Maternal Grandparent of P2 | Parent of P5 | Sibling of parent of P1 | Parent of P2 | Sibling of parent of P1 | Parent of P3 and P4 | Parent of P3 and P4 | P5   | Sibling of P5 | Sibling of P5 | P1   | Sibling of P2 | Sibling of P2 | P2   | Sibling of P2 | Sibling of P3 and P4 | P4   |
|-------------------------|-------------------|--------------------|--------------------|----------------------------|--------------|-------------------------|--------------|-------------------------|---------------------|---------------------|------|---------------|---------------|------|---------------|---------------|------|---------------|----------------------|------|
|                         | BTK-19 - 224nt    | 1                  | 1                  | 1.04                       | 1.02         | 1.03                    | 1.03         | 1.06                    | 1.03                | 0.98                | 1.06 | 1.01          | 1.05          | 1.08 | 0.99          | 1.02          | 1.12 | 1             | 1.02                 | 1.04 |
|                         | BTK-18 - 373nt    | 1                  | 1                  | 1.07                       | 1.05         | 1.05                    | 1.01         | 1.16                    | 1.08                | 1.08                | 1.05 | 0.99          | 1.03          | 1.04 | 1.02          | 1             | 0.98 | 1.06          | 1.06                 | 0.97 |
|                         | BTK-17 - 170nt    | 0.97               | 1.03               | 1.03                       | 1.02         | 1.06                    | 1.01         | 1.02                    | 1.07                | 1.01                | 1.04 | 1             | 1.01          | 1    | 1             | 1.03          | 1.04 | 1.06          | 1.03                 | 0.99 |
|                         | BTK-16 - 217nt    | 1                  | 1                  | 1.04                       | 1.01         | 1.03                    | 1.06         | 1.02                    | 1.03                | 1.01                | 1.06 | 1.01          | 1.04          | 1.11 | 1.01          | 1             | 1.11 | 1.04          | 1.05                 | 1.06 |
|                         | BTK-15 - 265nt    | 1.02               | 0.98               | 1.03                       | 1.05         | 1.01                    | 1.04         | 1                       | 1.03                | 1.07                | 1.02 | 0.98          | 0.97          | 0.95 | 0.98          | 1.02          | 1.01 | 1.02          | 1.05                 | 0.98 |
|                         | BTK-14 - 310nt    | 0.99               | 1.01               | 1.06                       | 1.05         | 1                       | 1.06         | 0.99                    | 1.07                | 1.02                | 1.09 | 1.01          | 0.99          | 1.04 | 0.99          | 0.97          | 1.03 | 1.03          | 1.07                 | 0.96 |
|                         | BTK-13 - 211nt    | 1                  | 1                  | 1.03                       | 1            | 1.02                    | 1            | 1.02                    | 1.03                | 0.98                | 1    | 1.02          | 1.01          | 1    | 0.97          | 0.98          | 1.06 | 0.99          | 1                    | 1    |
|                         | BTK-12 - 152nt    | 1                  | 1                  | 1                          | 1.01         | 1.02                    | 0.98         | 1.01                    | 0.99                | 1.02                | 1.02 | 1.03          | 1.01          | 1    | 0.97          | 1.02          | 1.07 | 0.98          | 0.99                 | 1.05 |
|                         | BTK-11 - 176nt    | 0.97               | 1.03               | 0.96                       | 1.01         | 0.99                    | 0.98         | 0.99                    | 0.97                | 1.09                | 0.94 | 0.97          | 0.94          | 1.01 | 0.96          | 1.03          | 0.94 | 0.97          | 1.03                 | 0.93 |
|                         | BTK-10 - 381nt    | 1.02               | 0.98               | 1.03                       | 1.1          | 1.04                    | 1.07         | 1.07                    | 1.11                | 1.09                | 1.05 | 1.01          | 1.07          | 1.07 | 0.99          | 1.05          | 1.02 | 1.06          | 1.09                 | 1    |
|                         | BTK-9 - 250nt     | 1                  | 1                  | 1.07                       | 1.06         | 1.06                    | 1.06         | 1.03                    | 1.07                | 1.05                | 1.11 | 1             | 1.02          | 1.08 | 1             | 1.03          | 1.04 | 1.08          | 1.12                 | 0.97 |
|                         | BTK-8 - 301nt     | 1.03               | 0.97               | 1.1                        | 1.13         | 1.06                    | 1.07         | 1.07                    | 1.07                | 0.99                | 1.12 | 1.08          | 1.11          | 1.08 | 1.01          | 1.04          | 1.11 | 1.03          | 1.05                 | 1.1  |
|                         | BTK-7 - 201nt     | 1.01               | 0.99               | 0.95                       | 0.95         | 1.01                    | 0.97         | 1.01                    | 0.97                | 0.98                | 0.96 | 1.01          | 1             | 1.01 | 1             | 0.97          | 1.01 | 0.97          | 0.97                 | 0.98 |
|                         | BTK-6 - 137nt     | 1                  | 1                  | 0.99                       | 0.95         | 0.99                    | 0.96         | 0.99                    | 0.98                | 1                   | 0.96 | 1.02          | 1.02          | 1.01 | 1             | 1             | 1.05 | 0.96          | 0.98                 | 1.01 |
|                         | BTK-5 - 361nt     | 0.99               | 1.01               | 0.54                       | 0.55         | 1.01                    | 0.54         | 1.05                    | 0.54                | 1.06                | 0    | 1             | 1.01          | 0    | 0.52          | 0.56          | 0    | 1.08          | 1.06                 | 0    |
|                         | BTK-4 - 349nt     | 1.01               | 0.99               | 0.57                       | 0.52         | 1.02                    | 0.53         | 1.01                    | 0.49                | 0.92                | 0    | 1.01          | 1.03          | 0    | 0.53          | 0.54          | 0    | 1.03          | 1.01                 | 0    |
|                         | BTK-3 - 243nt     | 0.99               | 1.01               | 0.58                       | 0.56         | 1                       | 0.54         | 0.97                    | 0.52                | 1.02                | 0    | 1.02          | 0.98          | 0    | 0.53          | 0.57          | 0    | 1.02          | 1.08                 | 0    |
|                         | BTK-2 - 196nt     | 1                  | 1                  | 1.05                       | 0.99         | 1.01                    | 1.04         | 1.02                    | 1.01                | 0.95                | 1.05 | 1             | 1.03          | 1.1  | 0.97          | 0.99          | 1.11 | 1.02          | 1.02                 | 1.04 |
|                         | BTK-1 - 164nt     | 1                  | 1                  | 1                          | 0.99         | 1.03                    | 1.01         | 1.03                    | 1.02                | 0.95                | 1.03 | 1             | 1.03          | 1.05 | 0.99          | 0.98          | 1.08 | 1.01          | 1                    | 1.04 |
|                         | RPL36A-5 - 330nt  | 0.98               | 1.02               | 1.01                       | 1            | 1                       | 1            | 0.95                    | 0.99                | 1                   | 0.92 | 0.96          | 0.95          | 1.07 | 0.97          | 0.98          | 0.93 | 1             | 1.02                 | 0.95 |
| <b>Test probes</b>      | GLA-6 - 229nt     | 0.98               | 1.02               | 1.02                       | 0.96         | 1                       | 1.03         | 0.97                    | 0.97                | 0.97                | 0.96 | 1             | 0.97          | 1.01 | 0.98          | 0.99          | 1.01 | 0.99          | 0.98                 | 0.99 |
|                         | Reference - 130nt | 0.97               | 1.03               | 0.95                       | 0.98         | 1                       | 0.98         | 0.99                    | 0.94                | 1.05                | 0.95 | 0.98          | 0.93          | 1.05 | 0.97          | 1             | 0.95 | 0.96          | 1.01                 | 0.98 |
|                         | Reference - 391nt | 1.01               | 0.99               | 1.06                       | 1.07         | 1.01                    | 1.11         | 1.06                    | 1.04                | 0.98                | 1.09 | 1.06          | 1.06          | 1.03 | 1.02          | 0.99          | 1.05 | 1.02          | 1.07                 | 1.04 |
|                         | Reference - 190nt | 1                  | 1                  | 1.01                       | 1.03         | 1.02                    | 1.03         | 1.03                    | 0.95                | 0.95                | 1.03 | 1             | 1.02          | 1.05 | 1             | 1.01          | 1.02 | 0.99          | 1                    | 1.02 |
|                         | Reference - 155nt | 1                  | 1                  | 0.99                       | 1            | 0.97                    | 0.95         | 0.98                    | 1.05                | 1.05                | 1    | 0.98          | 0.97          | 0.98 | 1.01          | 0.99          | 1    | 1.04          | 1                    | 0.97 |
|                         | Reference - 337nt | 1                  | 1                  | 0.98                       | 1            | 1                       | 0.98         | 1.01                    | 0.99                | 1.01                | 0.98 | 0.97          | 0.96          | 0.93 | 0.99          | 1.03          | 0.97 | 1             | 0.99                 | 0.99 |
|                         | Reference - 319nt | 0.99               | 1.01               | 1.02                       | 1.01         | 0.99                    | 1            | 0.98                    | 1.02                | 0.95                | 1.03 | 1.02          | 1.03          | 1.03 | 1.01          | 0.97          | 1.05 | 1             | 0.99                 | 1.01 |
|                         | Reference - 283nt | 1                  | 1                  | 1.02                       | 1            | 1                       | 0.99         | 1                       | 1.02                | 1.02                | 1    | 1             | 1             | 0.98 | 1             | 0.98          | 1    | 1.01          | 1.02                 | 0.98 |
| <b>Reference probes</b> | Reference - 256nt | 1                  | 1                  | 0.95                       | 0.96         | 1.05                    | 1.01         | 0.99                    | 0.95                | 0.99                | 0.94 | 0.99          | 1             | 0.98 | 0.95          | 1.02          | 0.97 | 0.93          | 0.96                 | 1    |
